# Supplementary material for: Predicting the Forest Canopy Height from LiDAR and Multi-Sensor Data Using Machine Learning over India
Source: MDPI journal article supplement (doi:10.3390/rs14235968), 2022-11-25
Supplement: s1 [file s1]

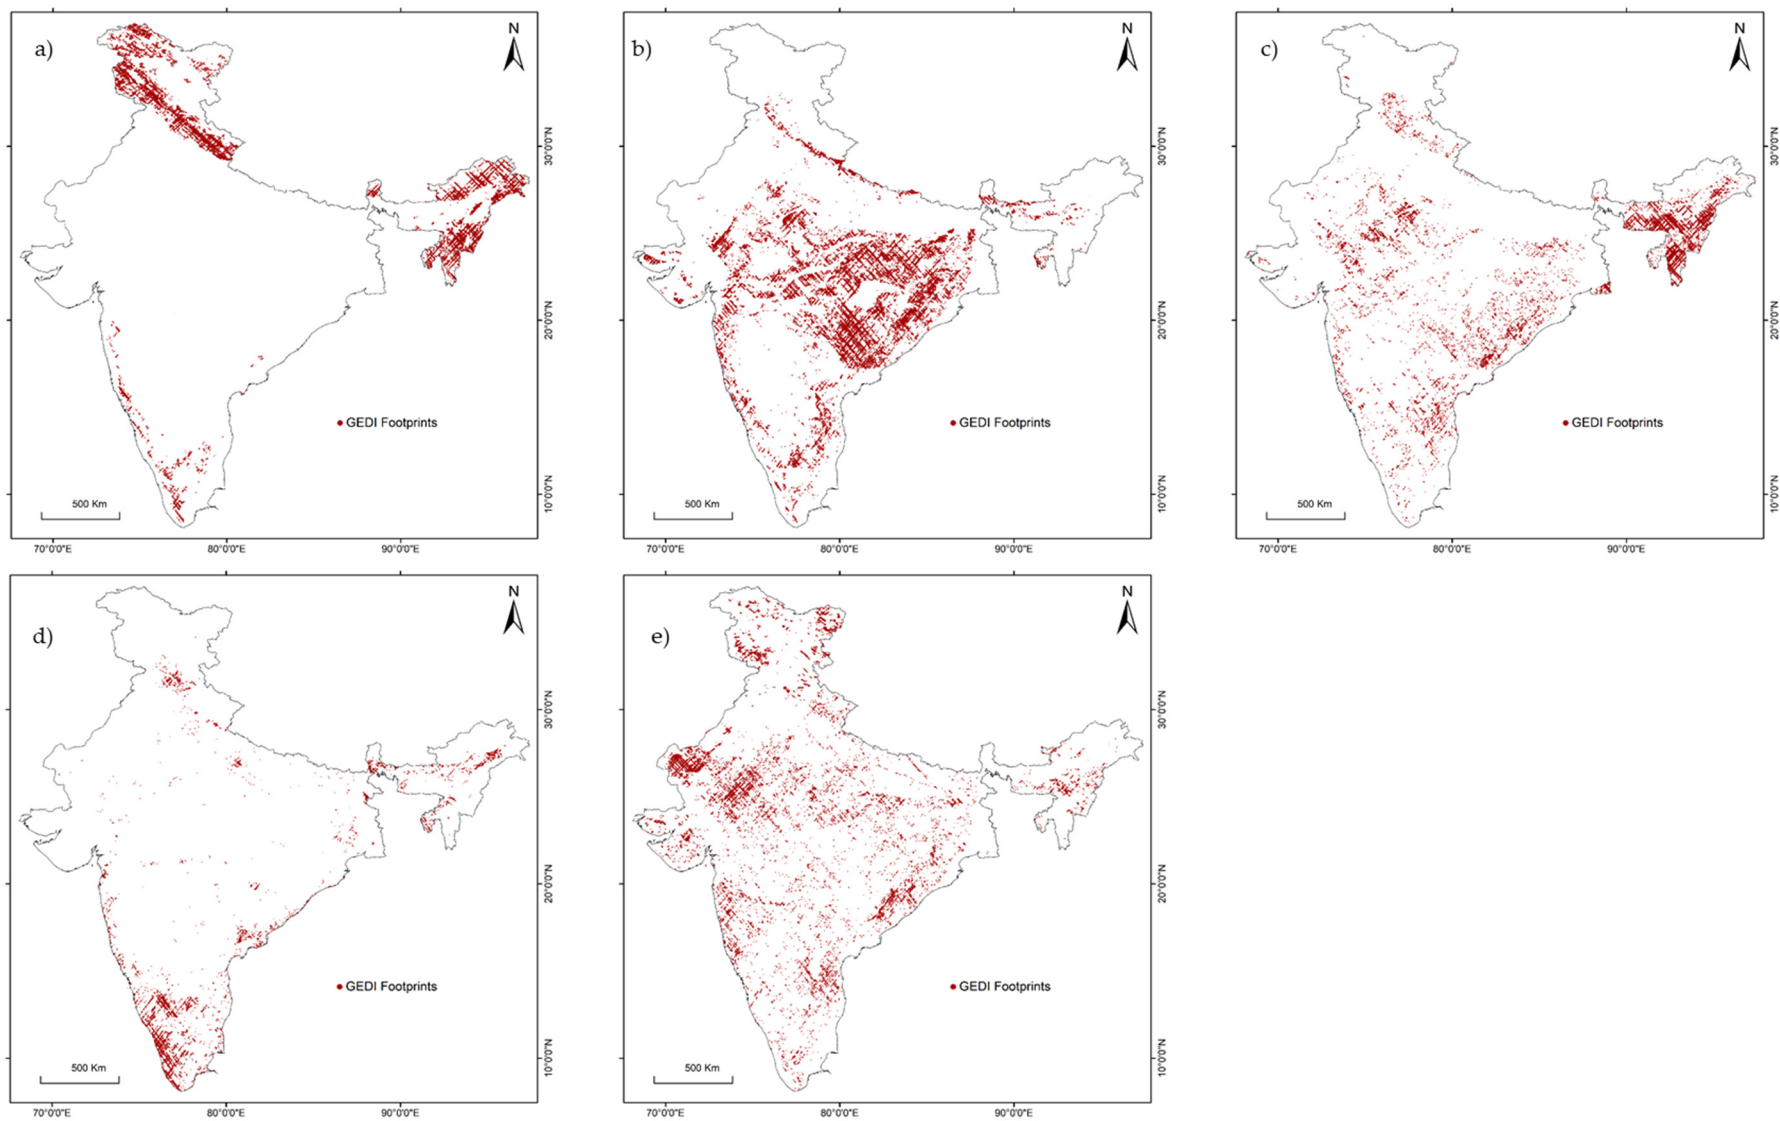

**Figure S1.** GEDI Footprints for a) Evergreen Forest, b) Deciduous Forest, c) Mixed Forest, d) Plantation and e) Shrubland

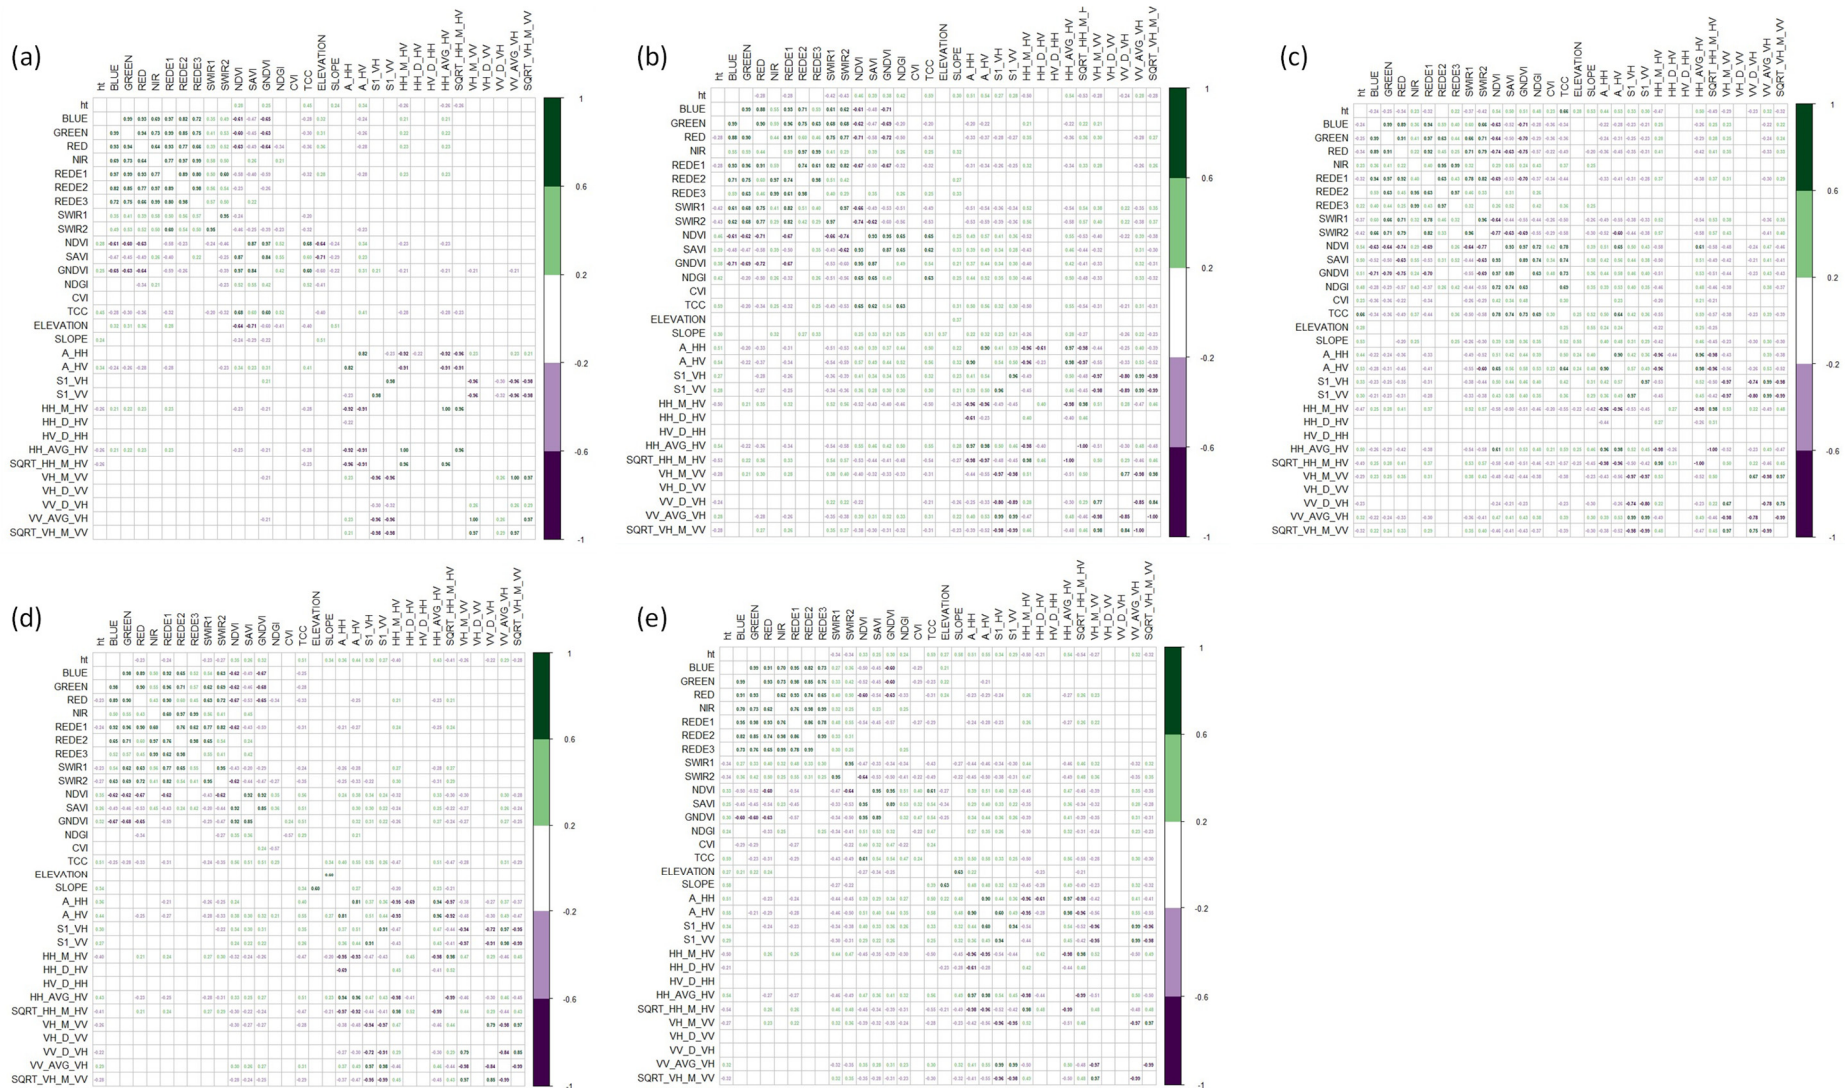

**Figure S2.** Correlation Plot between predictor variables and canopy height for (a) Evergreen Forests, (b) Deciduous Forests, (c) Mixed Forests, (d) Plantations, (e) Shrubland

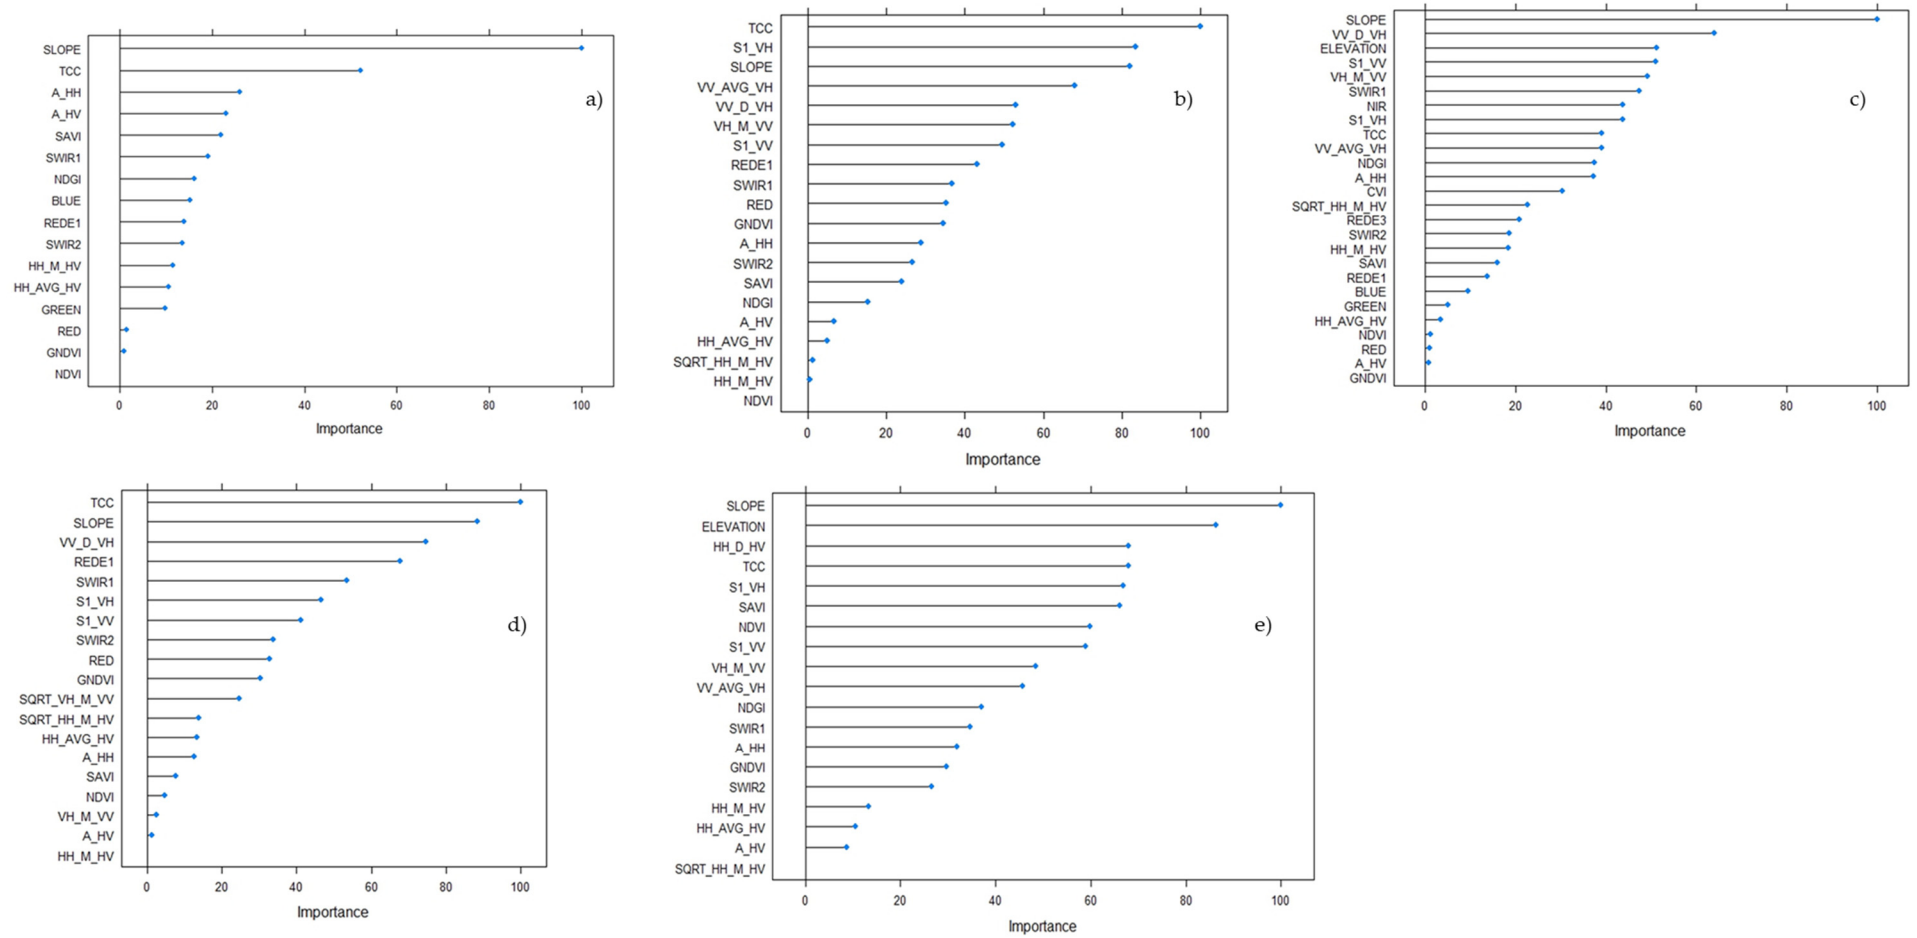

**Figure S3.** Variable importance chart for a) Evergreen Forest, b) Deciduous Forest, c) Mixed Forest, d) Plantation and e) Shrubland

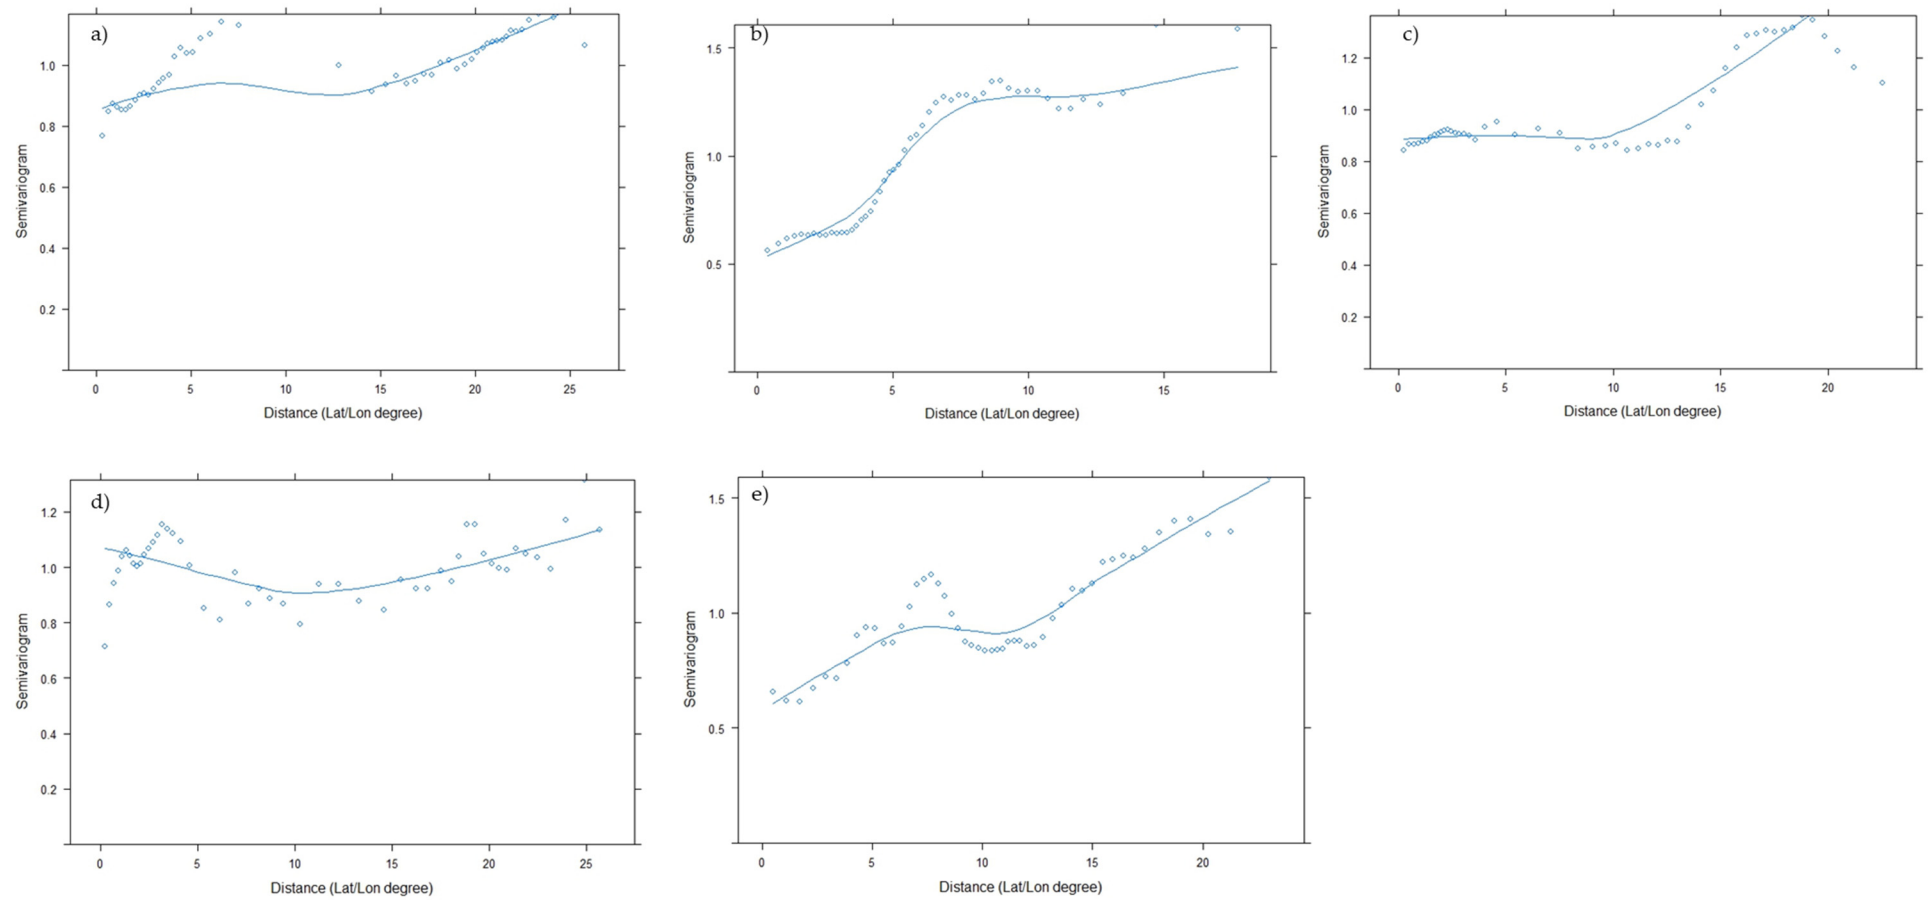

**Figure S4.** Spatial Auto Correlation for a) Evergreen Forest, b) Deciduous Forest, c) Mixed Forest, d) Plantation and e) Shrubland
