# Supplementary material for: Predicting the Forest Canopy Height from LiDAR and Multi-Sensor Data Using Machine Learning over India
Source: MDPI journal article supplement (doi:10.3390/rs14235968), 2022-11-25
Supplement: s1 [file s1]

Archive with 1 entries (1 files):
- remotesensing-1974732-supplementary.pdf
